# Supplementary material for: The lysosomal trafficking regulator “LYST”: an 80-year traffic jam
Source: PubMed Central journal article supplement (PMC11106369; doi:10.3389/fimmu.2024.1404846), 2024-05-07
Supplement: DataSheet_1.pdf [file DataSheet_1.pdf]

1. Yarnell DS, Roney JC, Teixeira C, Freitas MI, Cipriano A, Leuschner P, et al. Diagnosis of Chediak Higashi disease in a 67-year old woman. *Am J Med Genet A* [Internet]. 2020 Dec 1 [cited 2023 Jan 10];182(12):3007–13. Available from: <https://onlinelibrary.wiley.com/doi/full/10.1002/ajmg.a.61886>
2. Nagle DL, Karim MA, Woolf EA, Holmgren L, Bork P, Misumi DJ, et al. Identification and mutation analysis of the complete gene for Chediak–Higashi syndrome. *Nature Genetics* 1996 14:3 [Internet]. 1996 [cited 2023 Jan 10];14(3):307–11. Available from: <https://www.nature.com/articles/ng1196-307>
3. Koh K, Tsuchiya M, Ishiura H, Shimazaki H, Nakamura T, Hara H, et al. Chédiak-Higashi syndrome presenting as a hereditary spastic paraplegia. *J Hum Genet* [Internet]. 2022 Feb 1 [cited 2023 Jan 10];67(2):119–21. Available from: <https://pubmed.ncbi.nlm.nih.gov/34483340/>
4. Fukuchi K, Tatsuno K, Sakaguchi K, Sano S, Sasaki T, Aoki S, et al. Novel gene mutations in Chédiak-Higashi syndrome with hyperpigmentation. *J Dermatol* [Internet]. 2019 Nov 1 [cited 2023 Jan 10];46(11):e416–8. Available from: <https://pubmed.ncbi.nlm.nih.gov/31245861/>
5. Sánchez-Guiu I, Antón AI, García-Barberá N, Navarro-Fernández J, Martínez C, Fuster JL, et al. Chediak–Higashi syndrome: description of two novel homozygous missense mutations causing divergent clinical phenotype. *Eur J Haematol* [Internet]. 2014 Jan 1 [cited 2023 Jan 10];92(1):49–58. Available from: <https://onlinelibrary.wiley.com/doi/full/10.1111/ejh.12203>
6. Al-Tamemi S, Al-Zadjali S, Al-Ghafri F, Dennison D. Chediak-Higashi syndrome: novel mutation of the CHS1/LYST gene in 3 Omani patients. *J Pediatr Hematol Oncol* [Internet]. 2014 [cited 2023 Jan 10];36(4). Available from: <https://pubmed.ncbi.nlm.nih.gov/24072239/>
7. Bhambhani V, Introne WJ, Lungu C, Cullinane A, Toro C. Chediak-Higashi syndrome presenting as young-onset levodopa-responsive parkinsonism. *Mov Disord* [Internet]. 2013 Feb [cited 2023 Jan 10];28(2):127–9. Available from: <https://pubmed.ncbi.nlm.nih.gov/23436631/>
8. Karim MA, Nagle DL, Kandil HH, Bürger J, Moore KJ, Spritz RA. Mutations in the Chediak-Higashi syndrome gene (CHS1) indicate requirement for the complete 3801 amino acid CHS protein. *Hum Mol Genet* [Internet]. 1997 Jul [cited 2023 Jan 10];6(7):1087–9. Available from: <https://pubmed.ncbi.nlm.nih.gov/9215679/>
9. Westbroek W, Adams D, Huizing M, Koshoffer A, Dorward H, Tinloy B, et al. Cellular Defects in Chediak–Higashi Syndrome Correlate with the Molecular Genotype and Clinical Phenotype. *Journal of Investigative Dermatology* [Internet]. 2007 Nov 1 [cited 2023 Jan 10];127(11):2674–7. Available from: <http://www.jidonline.org/article/S0022202X15331924/fulltext>
10. Certain S, Barrat F, Pastural E, le Deist F, Goyo-Rivas J, Jabado N, et al. Protein truncation test of LYST reveals heterogenous mutations in patients with Chediak-Higashi syndrome. *Blood*. 2000 Feb 1;95(3):979–83.
11. Dufourcq-Lagelouse R, Lambert N, Duval M, Viot G, Vilmer E, Fischer A, et al. Chediak-Higashi syndrome associated with maternal uniparental isodisomy of

- chromosome 1. *Eur J Hum Genet* [Internet]. 1999 [cited 2023 Jan 11];7(6):633–7. Available from: <https://pubmed.ncbi.nlm.nih.gov/10482950/>
12. Jin Y, Zhang L, Wang S, Chen F, Gu Y, Hong E, et al. Whole Genome Sequencing Identifies Novel Compound Heterozygous Lysosomal Trafficking Regulator Gene Mutations Associated with Autosomal Recessive Chediak-Higashi Syndrome. *Sci Rep* [Internet]. 2017 Feb 1 [cited 2023 Jan 11];7. Available from: <https://pubmed.ncbi.nlm.nih.gov/28145517/>
  13. Scherber E, Beutel K, Ganschow R, Schulz A, Janka G, Stadt U zur. Molecular analysis and clinical aspects of four patients with Chédiak-Higashi syndrome (CHS). *Clin Genet* [Internet]. 2009 Oct [cited 2023 Jan 11];76(4):409–12. Available from: <https://pubmed.ncbi.nlm.nih.gov/19650863/>
  14. Gomaa NS, Lee JYW, el Sharkawy A, el Chazli YF, Hassab HMA, Doghaim NN, et al. Genetic analysis in Egyptian patients with Chediak-Higashi syndrome reveals new LYST mutations. *Clin Exp Dermatol* [Internet]. 2019 Oct 1 [cited 2023 Jan 11];44(7):814–7. Available from: <https://pubmed.ncbi.nlm.nih.gov/30815890/>
  15. Tanabe F, Kasai H, Morimoto M, Oh S, Takada H, Hara T, et al. Novel Heterogenous CHS1 Mutations Identified in Five Japanese Patients with Chediak-Higashi Syndrome. *Case Rep Med* [Internet]. 2010 [cited 2023 Jan 11];2010. Available from: </pmc/articles/PMC3014749/>
  16. Shimazaki H, Honda J, Naoi T, Namekawa M, Nakano I, Yazaki M, et al. Autosomal-recessive complicated spastic paraplegia with a novel lysosomal trafficking regulator gene mutation. *J Neurol Neurosurg Psychiatry*. 2014;85(9):1024–8.
  17. Singh A, Bryan MM, Roney JC, Cullinane AR, Gahl WA, Khurana N, et al. A clinical report of Chediak-Higashi syndrome in infancy with a novel genotype from the Indian subcontinent. *Int J Dermatol* [Internet]. 2016 Mar 1 [cited 2023 Jan 11];55(3):317–21. Available from: <https://pubmed.ncbi.nlm.nih.gov/26499269/>
  18. Kaya Z, Ehl S, Albayrak M, Maul-Pavivic A, Schwarz K, Kocak U, et al. A novel single point mutation of the LYST gene in two siblings with different phenotypic features of Chediak Higashi syndrome. *Pediatr Blood Cancer* [Internet]. 2011 Jul 1 [cited 2023 Jan 12];56(7):1136–9. Available from: <https://pubmed.ncbi.nlm.nih.gov/21488161/>
  19. Song Y, Dong Z, Luo S, Yang J, Lu Y, Gao B, et al. Identification of a compound heterozygote in LYST gene: a case report on Chediak-Higashi syndrome. *BMC Med Genet* [Internet]. 2020 Jan 6 [cited 2023 Jan 12];21(1). Available from: </pmc/articles/PMC6943916/>
  20. Möttönen M, Lanning M, Baumann P, Saarinen-Pihkala U. Chediak-Higashi syndrome: four cases from Northern Finland. *Acta Paediatr* [Internet]. 2003 Sep 1 [cited 2023 Jan 11];92(9):1047–51. Available from: <https://onlinelibrary.wiley.com/doi/full/10.1111/j.1651-2227.2003.tb02575.x>
  21. Helmi MM, Saleh M, Yacop B, Elsayy D. Chédiak-Higashi syndrome with novel gene mutation. [cited 2023 Jan 11]; Available from: <http://casereports.bmj.com/>
  22. Nielsen C, Agergaard CN, Jakobsen MA, Møller MB, Fisker N, Barington T. Infantile hemophagocytic lymphohistiocytosis in a case of chediak-higashi syndrome caused by a mutation in the LYST/CHS1 gene presenting with delayed umbilical cord detachment and diarrhea. *J Pediatr Hematol Oncol* [Internet]. 2015 Mar 6 [cited 2023 Jan 12];37(2):e73–9. Available from: <https://pubmed.ncbi.nlm.nih.gov/25551669/>

23. Wang M, Qu LJ, Wang J, Chen TP, Li Y, Xu Z, et al. [A novel mutation of the LYST gene in a Chinese family with Chediak-Higashi syndrome]. *Zhonghua Er Ke Za Zhi* [Internet]. 2019 [cited 2023 Jan 11];57(12):963–5. Available from: <https://pubmed.ncbi.nlm.nih.gov/31795567/>
24. Faber IV, Prota JRM, Martinez ARM, Nucci A, Lopes-Cendes I, Júnior MCF. Inflammatory demyelinating neuropathy heralding accelerated chediak-higashi syndrome. *Muscle Nerve* [Internet]. 2017 May 1 [cited 2023 Jan 11];55(5):756–60. Available from: <https://onlinelibrary.wiley.com/doi/full/10.1002/mus.25414>
25. Boluda-Navarro M, Ibáñez M, Liquori A, Franco-Jarava C, Martínez-Gallo M, Rodríguez-Vega H, et al. Case Report: Partial Uniparental Disomy Unmasks a Novel Recessive Mutation in the LYST Gene in a Patient With a Severe Phenotype of Chédiak-Higashi Syndrome. *Front Immunol*. 2021 Mar 31;12:1043.
26. Sun Y, Li Y, Hao J. Rare inclusion bodies within monocytes at accelerated phase of Chediak-Higashi syndrome. *Clin Chem Lab Med* [Internet]. 2018 Apr 25 [cited 2023 Jan 11];56(5):e105–7. Available from: <https://pubmed.ncbi.nlm.nih.gov/29194041/>
27. Weisfeld-Adams JD, Mehta L, Rucker JC, Dembitzer FR, Szporn A, Lublin FD, et al. Atypical Chédiak-Higashi syndrome with attenuated phenotype: three adult siblings homozygous for a novel LYST deletion and with neurodegenerative disease. *Orphanet J Rare Dis* [Internet]. 2013 [cited 2023 Jan 11];8(1). Available from: <https://pubmed.ncbi.nlm.nih.gov/23521865/>
28. Zarzour W, Kleta R, Frangoul H, Suwannarat P, Jeong A, Su YK, et al. Two novel CHS1 (LYST) mutations: clinical correlations in an infant with Chediak-Higashi syndrome. *Mol Genet Metab* [Internet]. 2005 Jun [cited 2023 Jan 11];85(2):125–32. Available from: <https://pubmed.ncbi.nlm.nih.gov/15896657/>
29. Manoli I, Golas G, Westbroek W, Vilboux T, Markello TC, Introne W, et al. Chediak-Higashi Syndrome with early Developmental Delay resulting from Paternal Heterodisomy of Chromosome 1. *Am J Med Genet A* [Internet]. 2010 Jun [cited 2023 Jan 11];152A(6):1474. Available from: /pmc/articles/PMC2947940/
